# Supplementary material for: The synthesis and characterization of three organic–inorganic hybrids based on different transition metal complexes and {As8V14O42(H2O)} clusters
Source: Royal Society of Chemistry journal article supplement (doi:10.1039/c3ce42450b), 2014-01-01
Supplement: c3ce42450b.pdf [file c3ce42450b.pdf]

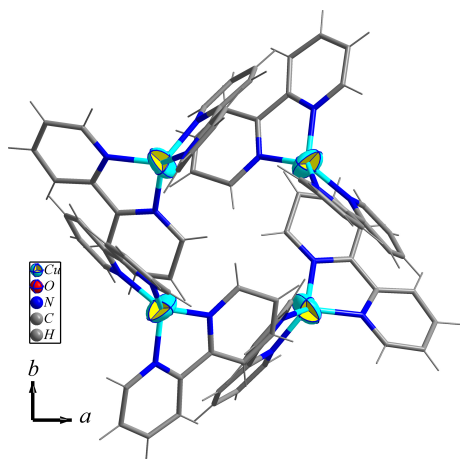

Fig. s1 The view of the 1-D supramolecular column formed by [Cu(1)(2,2-bpy)<sub>2</sub>]<sup>2+</sup> complexes in compound **1** along the c axis.

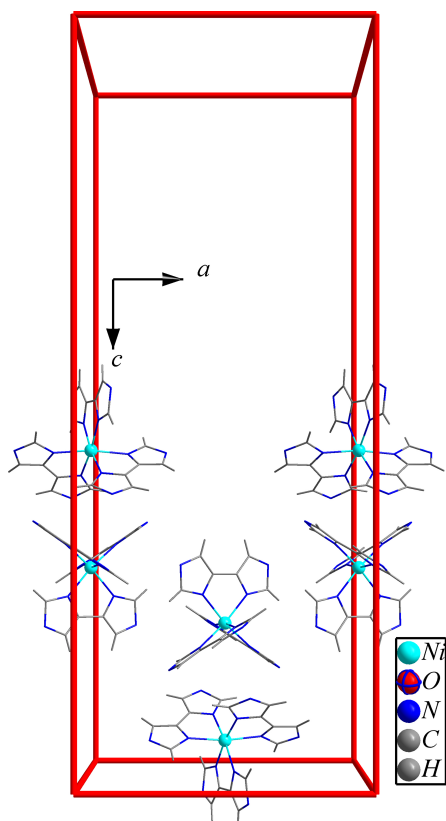

Fig. s2 the packing structure of the TMCs in compound **3**.

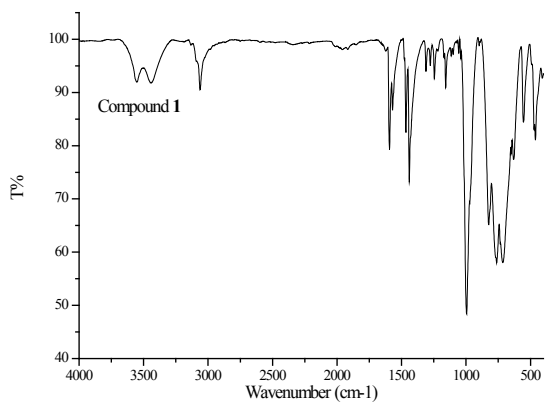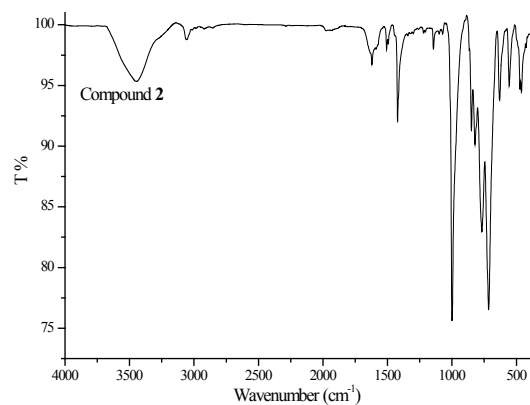

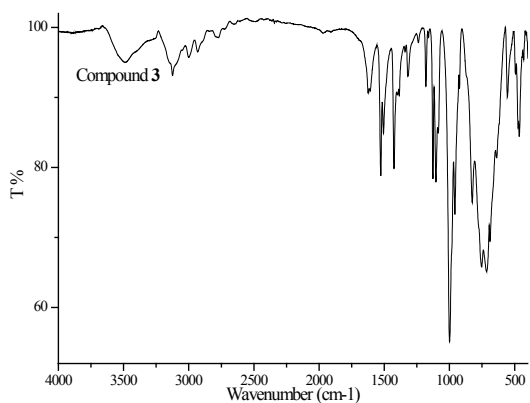

Fig. s3 the IR spectra for compounds 1-3.

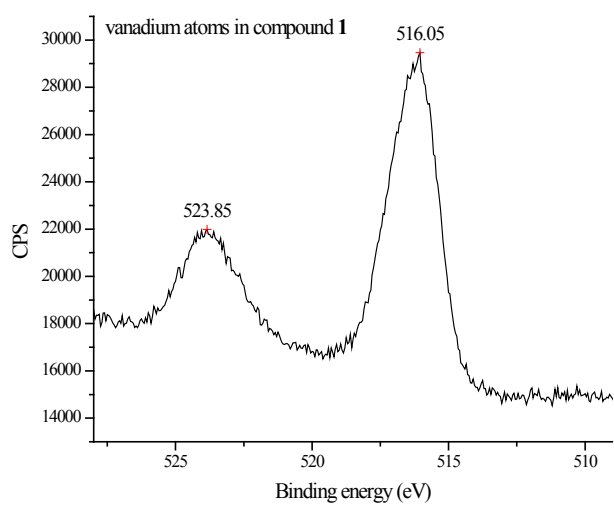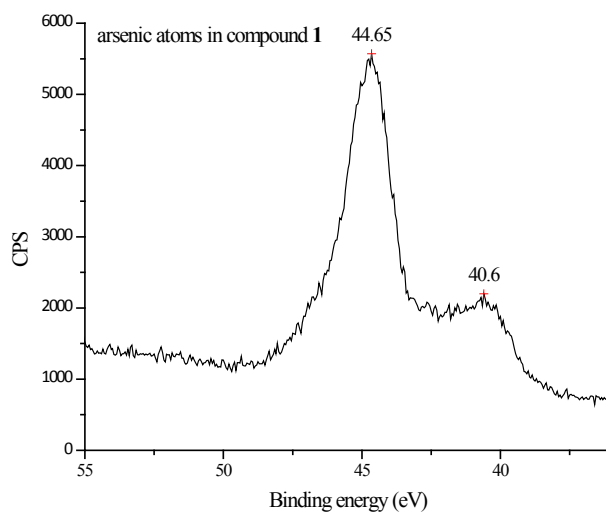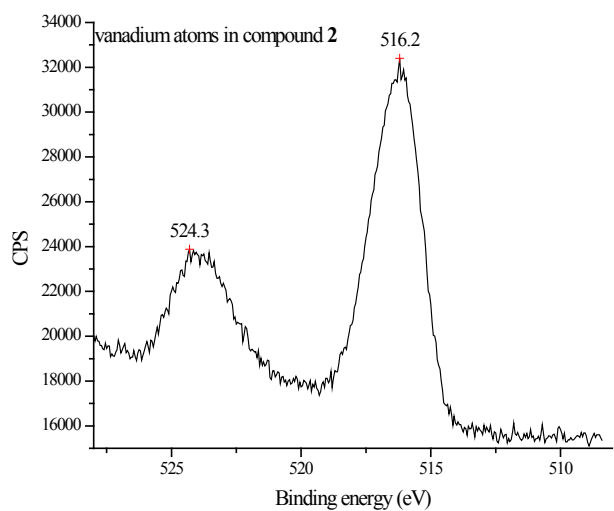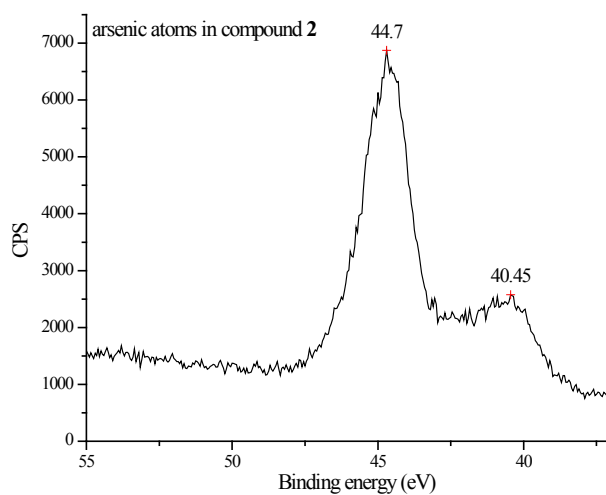

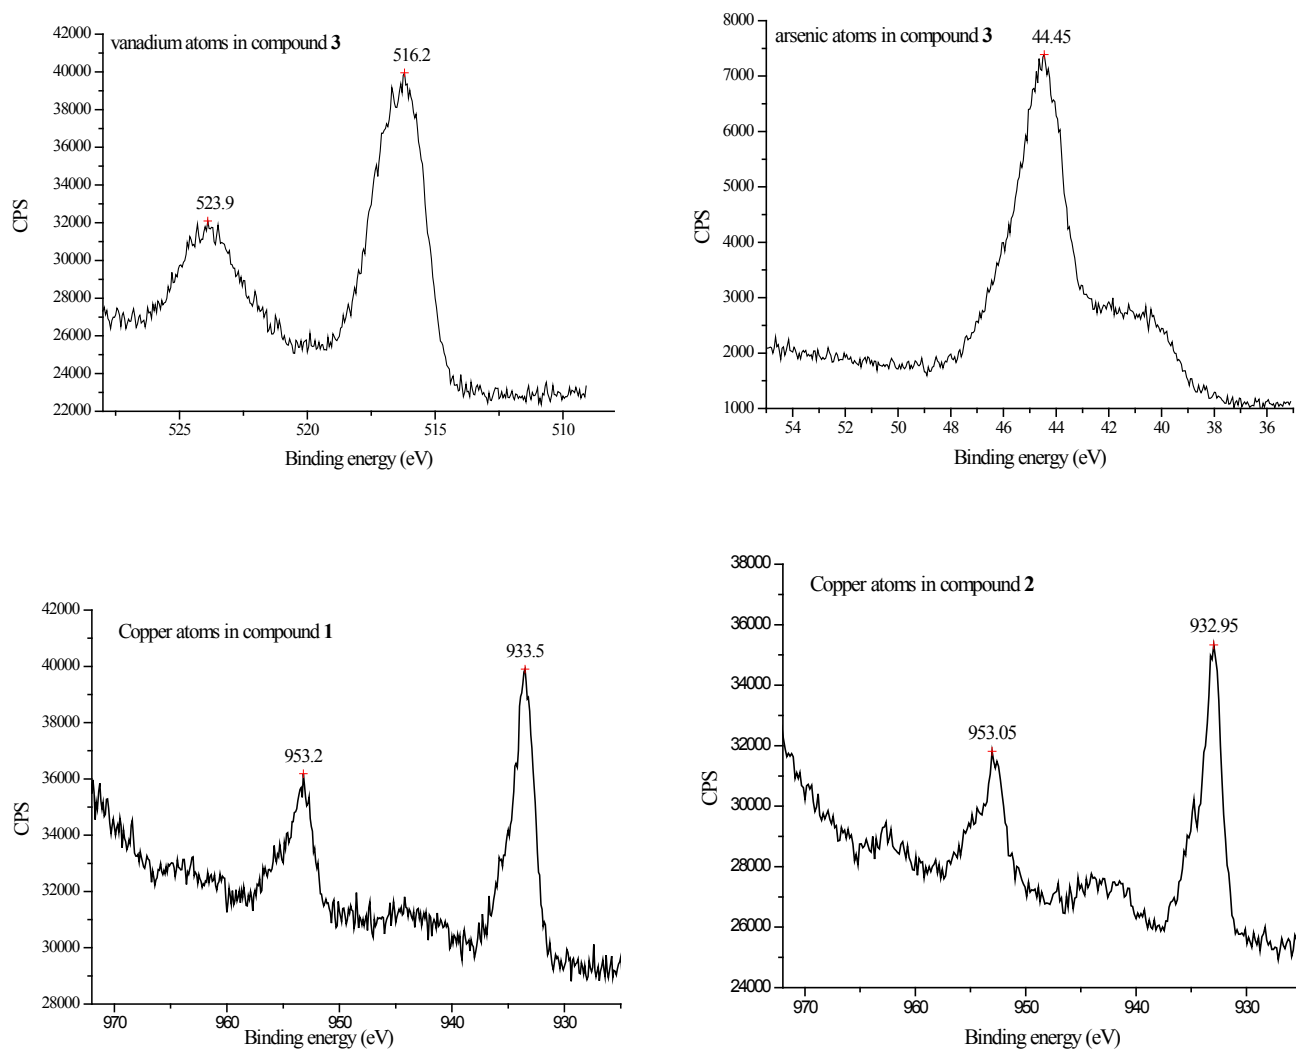

Fig. s4 the XPS spectra of vanadium, arsenic in compounds 1-3 and XPS spectra of copper in compounds 1-2.

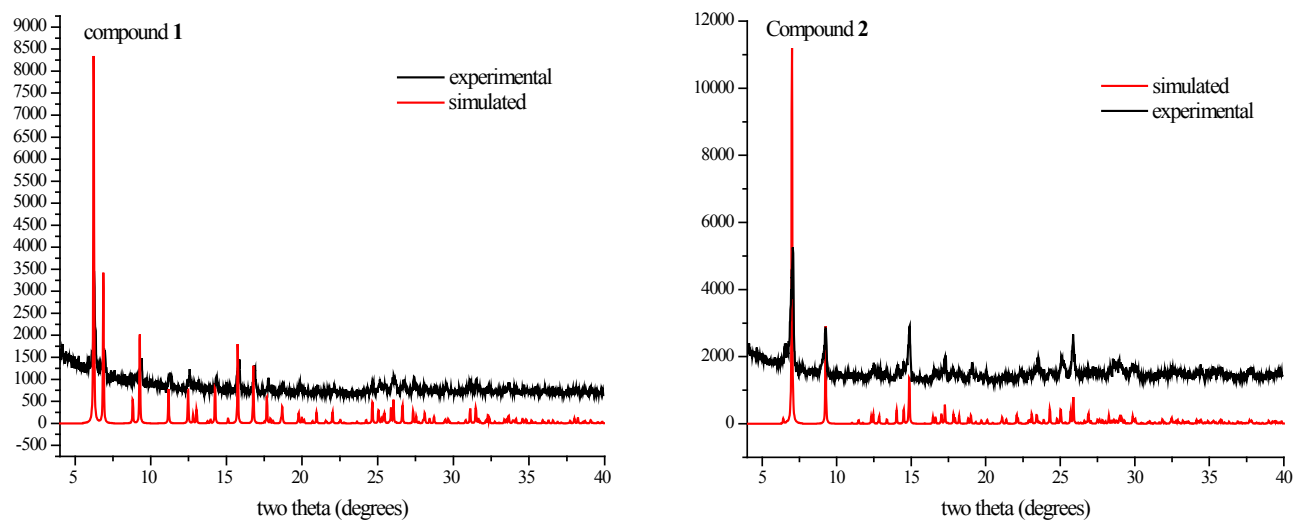

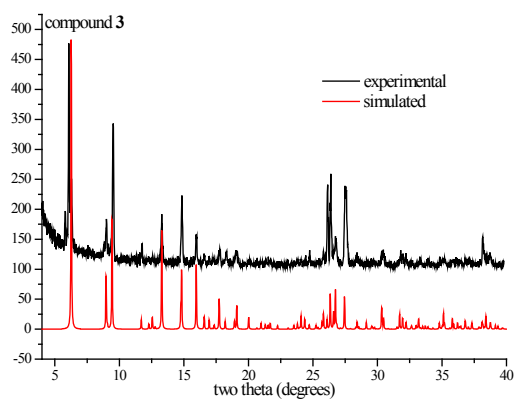

Fig. s5 the experimental and simulated XRD patterns for compounds 1-3.

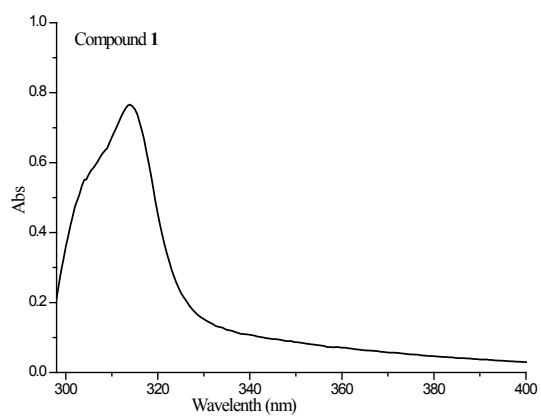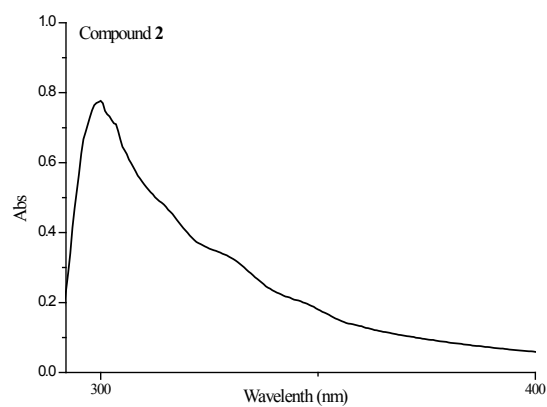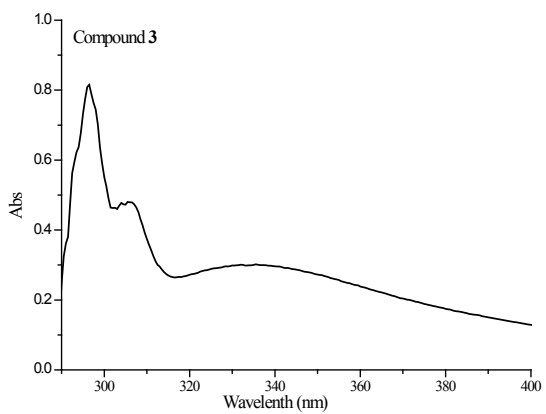

Fig. s6 the UV-Vis spectra of DMSO solutions of compounds 1-3.

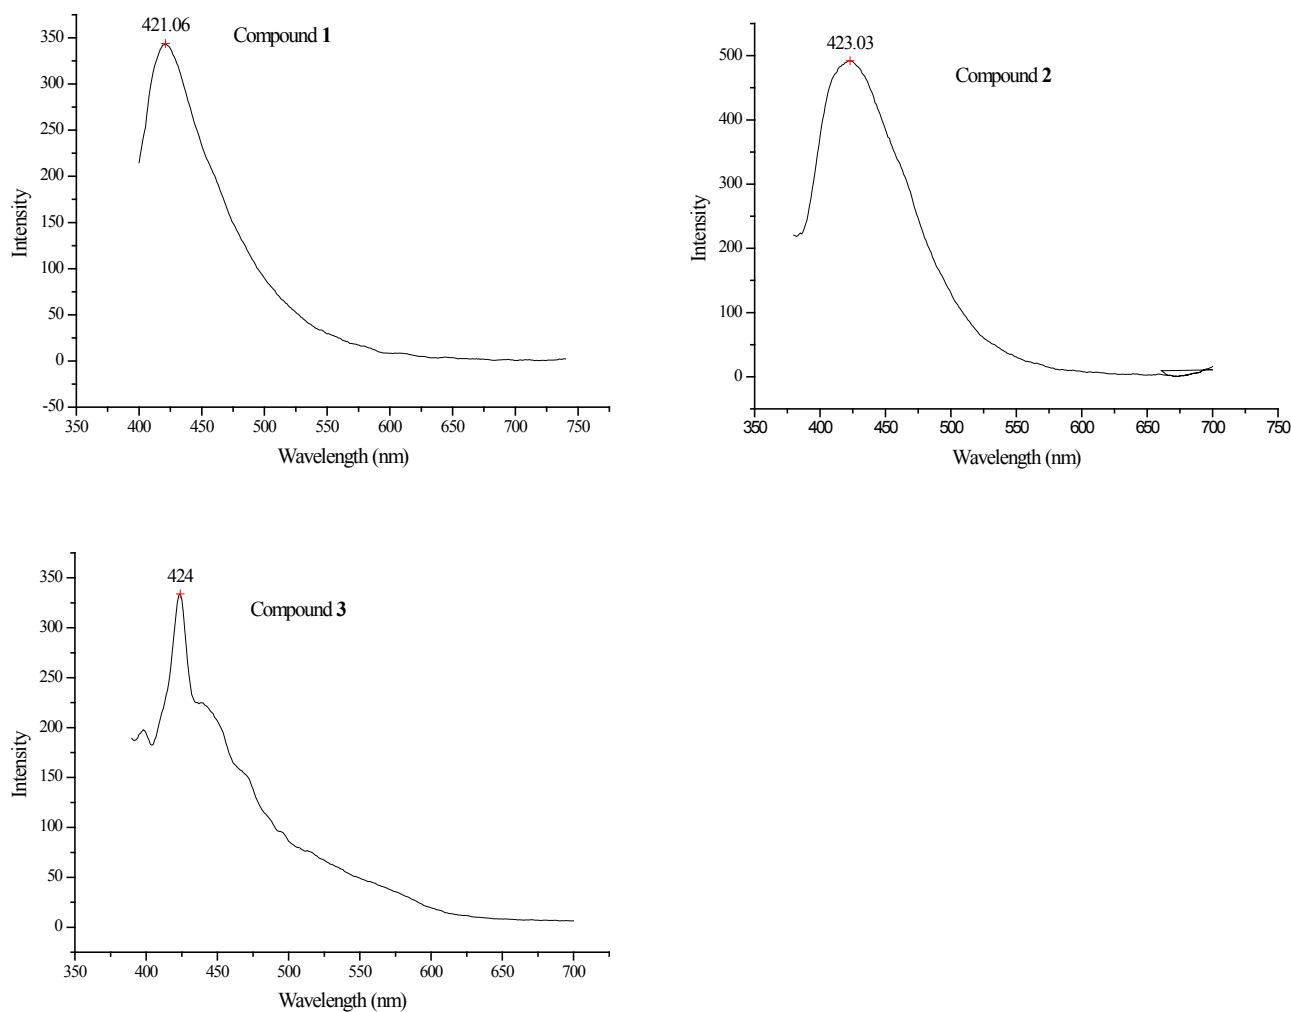

Fig. s7 the photoluminescence properties of DMSO solutions of compounds **1-3**. The photoluminescence properties of DMSO solutions of compounds **1-3** were studied. The emission spectrum of compound **1** at room temperature is depicted in Fig. s6. It can be observed that an intense emission occurs at 421 nm ( $\lambda_{\text{ex}} = 380$  nm), which can be assigned to the emission of intra-ligand charge transfer. The emission peak in compound **1** is red shifted relative to that of the free 2,2-bpy ligand ( $\lambda_{\text{max}} = 415$  nm). The red shift has been regarded as due to the complexation of the organic ligand with the copper atom. The emission spectra of compounds **2-3** at room temperature are depicted in Fig. s6. Compound **2** exhibits an emission peak at 423 nm ( $\lambda_{\text{ex}} = 360$  nm), compound **3** exhibits an emission peak at 424 nm ( $\lambda_{\text{ex}} = 371$  nm), respectively. The photoluminescence mechanism of compounds **2-3** can also be attributed to the intra-ligand transition because that similar emission is also observed for pure organic ligands.
